# Supplementary figures and images for: Noninvasive Monitoring of Liver Disease Regression after Hepatitis C Eradication Using Gadoxetic Acid-Enhanced MRI
Source: Hindawi journal article supplement (doi:10.1155/2018/8489709), 2018-07-12

Signal Intensity

□ Baseline  
▨ Follow-up

800

600

400

200

0

Unenhanced

AP

PVP

TP

HBP

$P=1$

$P=1$

$P=0.39$

$P=0.002$

$P=0.005$

8

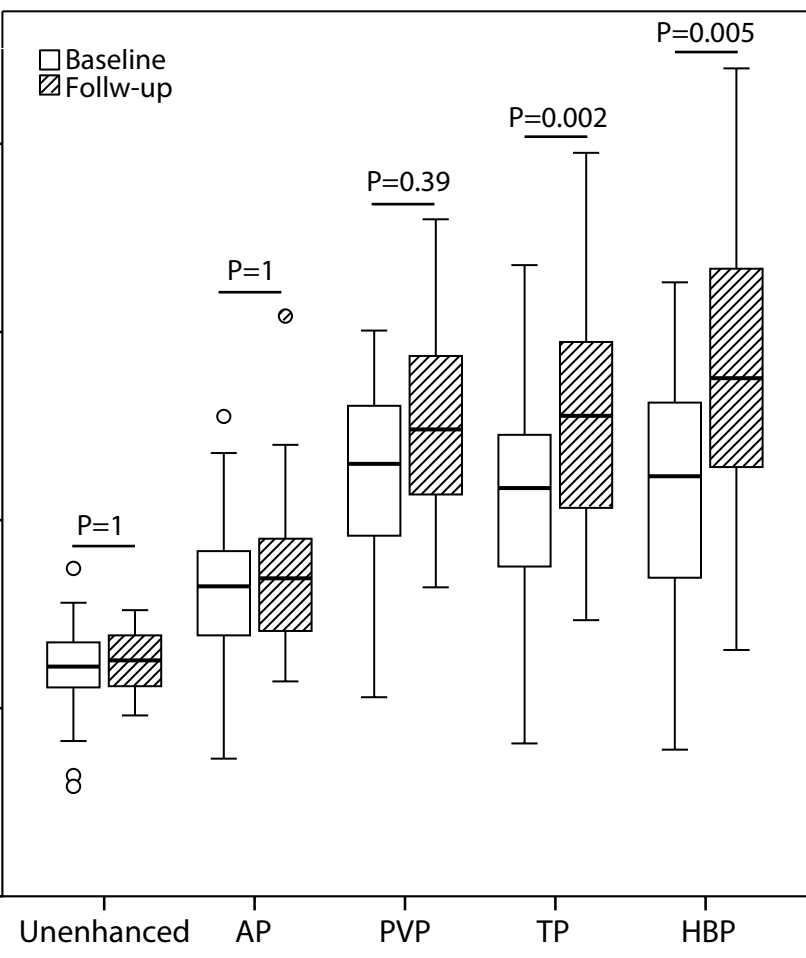

Supplement: f1 [file 8489709.f1.ai]

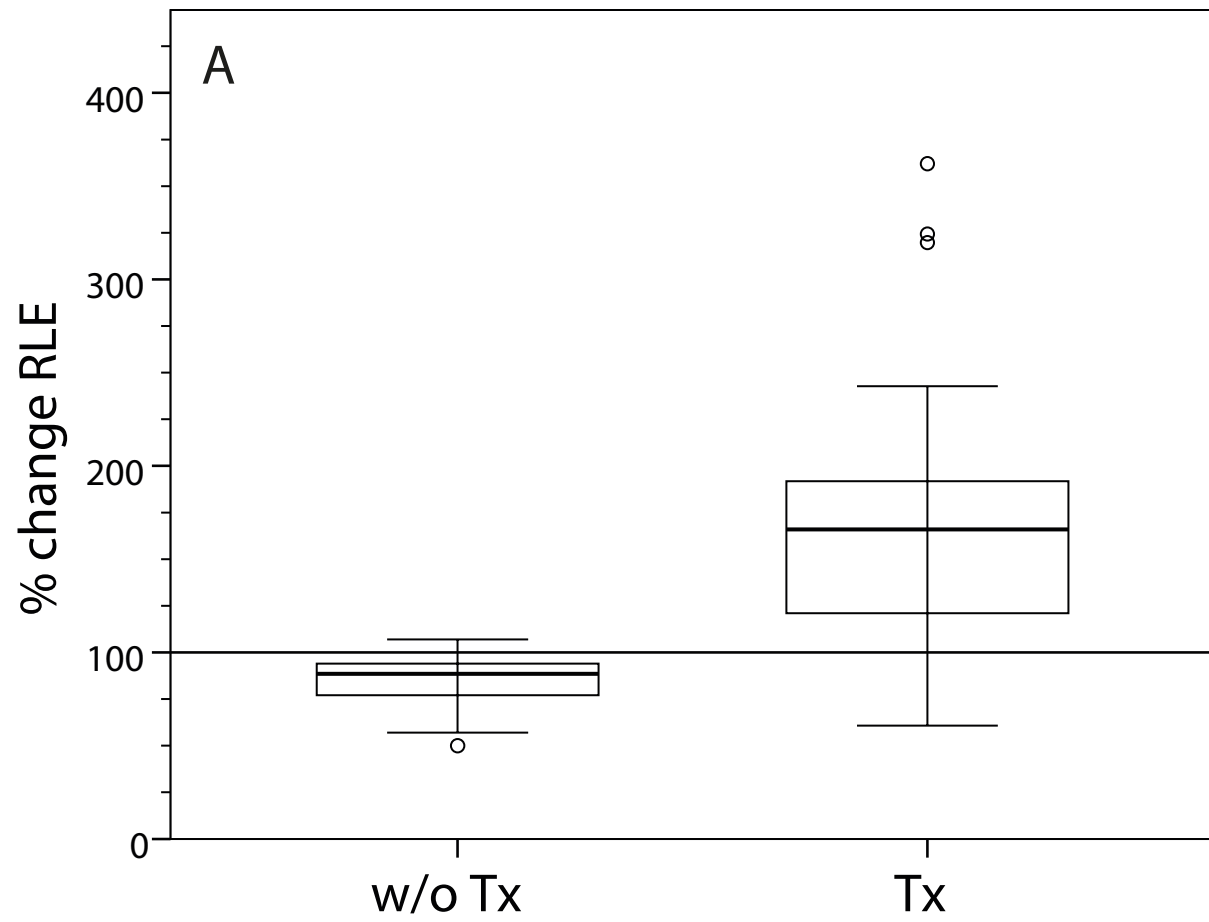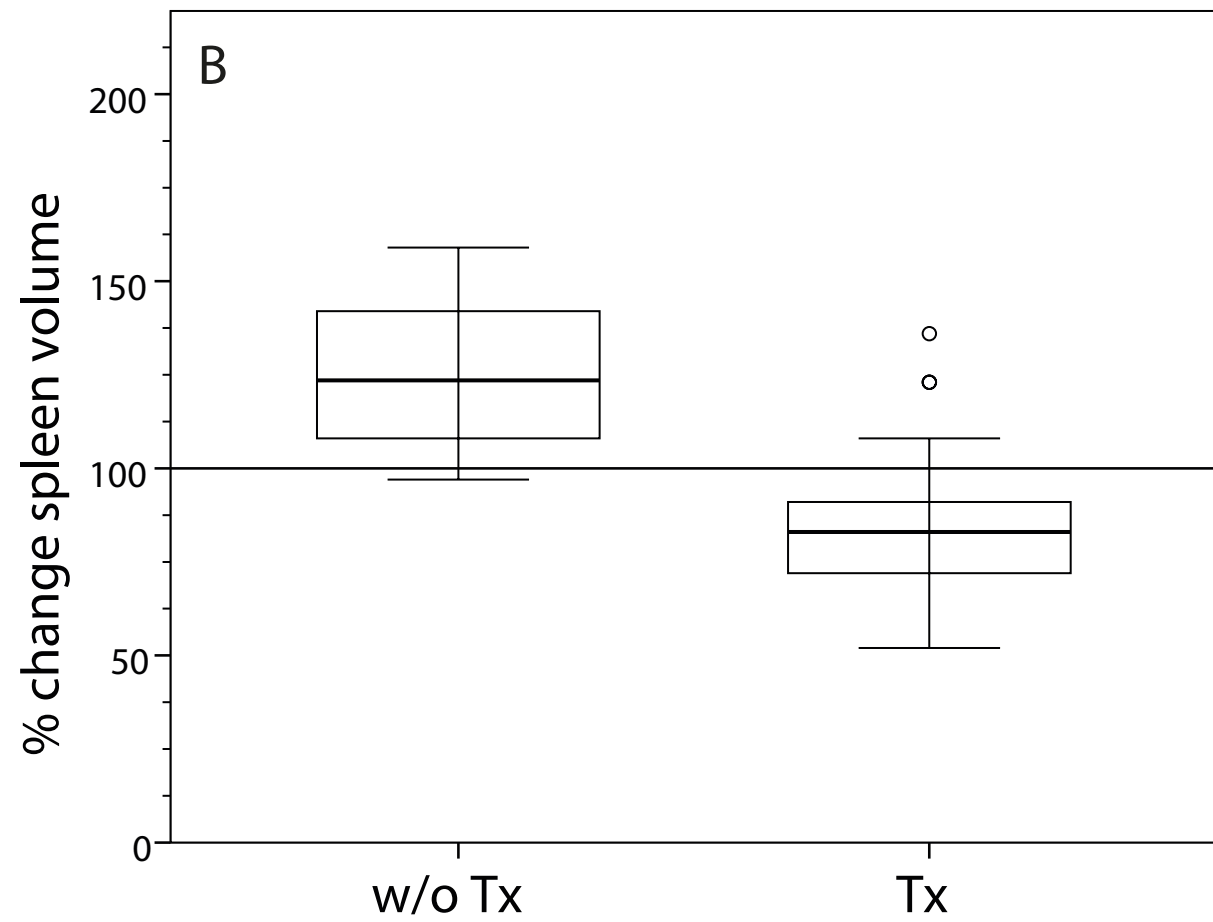

Supplement: f3 [file 8489709.f3.ai]
